# Supplementary material for: The Lake Chad hydrology under current climate change
Source: PubMed Central journal article supplement (PMC7099084; doi:10.1038/s41598-020-62417-w), 2020-03-26
Supplement: 41598_2020_62417_MOESM1_ESM.pdf [file 41598_2020_62417_MOESM1_ESM.pdf]

# 1 **Supporting information for "The Lake Chad hydrology un-** 2 **der current climate change"**

3 Binh Pham-Duc<sup>1,2,\*</sup>, Florence Sylvestre<sup>1</sup>, Fabrice Papa<sup>3,4</sup>, Frédéric Frappart<sup>3</sup>, Camille Bouchez<sup>5</sup>,  
4 and Jean-Francois Crétaux<sup>3</sup>

5 <sup>1</sup>*Aix-Marseille Université, CNRS, IRD, Collège de France, INRA, CEREGE, Europôle de*  
6 *l'Arbois, Aix-en-Provence, France*

7 <sup>2</sup>*Department of Space and Applications, University of Science and Technology of Hanoi, Vietnam*  
8 *Academy of Science and Technology, Hanoi, Vietnam*

9 <sup>3</sup>*LEGOS, Université de Toulouse, IRD, CNES, CNRS, UPS, Toulouse, France*

10 <sup>4</sup>*Universidade de Brasília, Institute of Geosciences, Campus Universitario Darcy Ribeiro, 70910-*  
11 *900 Brasilia (DF), Brazil*

12 <sup>5</sup>*Université Rennes, CNRS, Géosciences Rennes, UMR 6118, Rennes, France*

## 13 Datasets

14 We use MODIS/Terra atmospherically corrected surface reflectance 8-day Level 3 Global 500 m  
15 SIN Grid V006 imagery (MOD09A1) for detecting and monitoring monthly variation of surface  
16 water extent of Lake Chad at 500 m spatial resolution, for the 2001-2018 period. Although MODIS  
17 has moderate spatial resolution compared to other satellite products (for example, Landsat at 30  
18 m and Sentinel-2 at 10-20 m). However, MODIS presents a strong advantage with its tempo-  
19 ral resolution since it offers 2 images per day compared to 16 days for Landsat or 10 days with  
20 Sentinel-2. Moreover, it offers longer time series than Sentinel-2 which observations started in  
21 mid-2015. MOD09A1 imagery used in this study are freely distributed from the NASA's Earth-  
22 Data Hub (<https://search.earthdata.nasa.gov/search>). For validation purposes  
23 with MODIS surface water maps, we use atmospherically corrected surface reflectance Landsat-8  
24 and Sentinel-2 imagery at 30 m and 10 m spatial resolution, respectively. Landsat-8 imagery are or-  
25 dered from the USGS EarthExplorer website (<https://earthexplorer.usgs.gov/>), and  
26 Sentinel-2 Level-1C Top-of-Atmosphere (TOA) imagery are downloaded from the Sentinel Data  
27 Hub (<https://scihub.copernicus.eu/dhus/#/home>). To limit the effects of clouds,  
28 only Landsat and Sentinel-2 imagery with  $\leq 5\%$  of cloud contamination are used. Temporal  
29 distribution of all 51 Landsat-8 and 43 Sentinel-2 imagery used in this study is shown in Figure  
30 S1.

31 Radar satellite altimetry data from two 35-day repeat period missions (ENVISAT, and SARAL)  
32 are used to estimate monthly variation of surface water levels at different parts of Lake Chad for

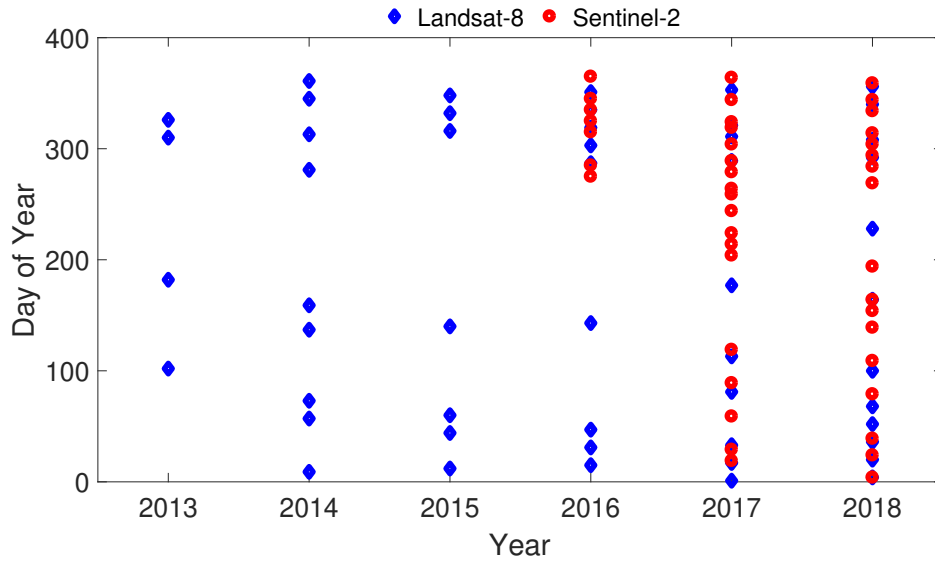

Figure S1: Temporal distribution of 51 Landsat-8 and 43 Sentinel-2 imagery used in this study.

33 the 2003-2015 period. All altimetry data used in this study were processed, validated, and dis-  
 34 tributed by the Center of Topography of the Oceans and the Hydrosphere (CTOH) in the Labora-  
 35 toire d'Études en Géophysique et Océanographie Spatiales (LEGOS), France (<http://ctoh.legos.obs-mop.fr/>). Note that altimetry data from missions with a 10-day repeat period  
 36 (for instance, Jason-1,2,3) are available but only used to construct the water height of the south-  
 37 ern pool as there is no intersection between the satellite ground-tracks and other parts of Lake  
 38 Chad. For the southern pool, we use directly water height data collected from the Hydroweb<sup>1</sup>  
 39 (<http://hydroweb.theia-land.fr/>).

41 GRACE Land Mass Grids - Global mascons products (Release 06) (<https://grace.jpl.nasa.gov/data/get-data/>) are also used to estimate monthly variation of total land  
 42 surface water storage for the 2003-2016 period, with an accuracy of  $\sim 1.5$  cm of equivalent water  
 43 thickness<sup>2,3</sup>. Monthly GRACE data are provided by three different processing centers: the Geo-

45 forschungszentrum Potsdam (GFZ), the Center for Space Research at University of Texas, Austin  
46 (CSR), and the Jet Propulsion Laboratory (JPL). The three products are averaged to reduce noise in  
47 the gravity field solutions<sup>4</sup>, then the output is multiplied with the provided GRACE scaling factor  
48 to increase the accuracy of the GRACE total water storage estimates<sup>5</sup>. Although GRACE spatial  
49 resolution is  $\sim 300$  km, the product we use is distributed on a  $0.25^\circ \times 0.25^\circ$  pixel-size grid.

50 We use GLEAM 3.3 version dataset<sup>6,7</sup> to estimate monthly variation of root-zone soil mois-  
51 ture over Lake Chad at  $0.25^\circ \times 0.25^\circ$  pixel-size grid, for the 2003-2016 period. The dataset is  
52 distributed at <https://www.gleam.eu/> where several details can be found.

53 Figure S2 shows all satellite datasets used in this study, and some available satellite datasets  
54 could be used in future studies.

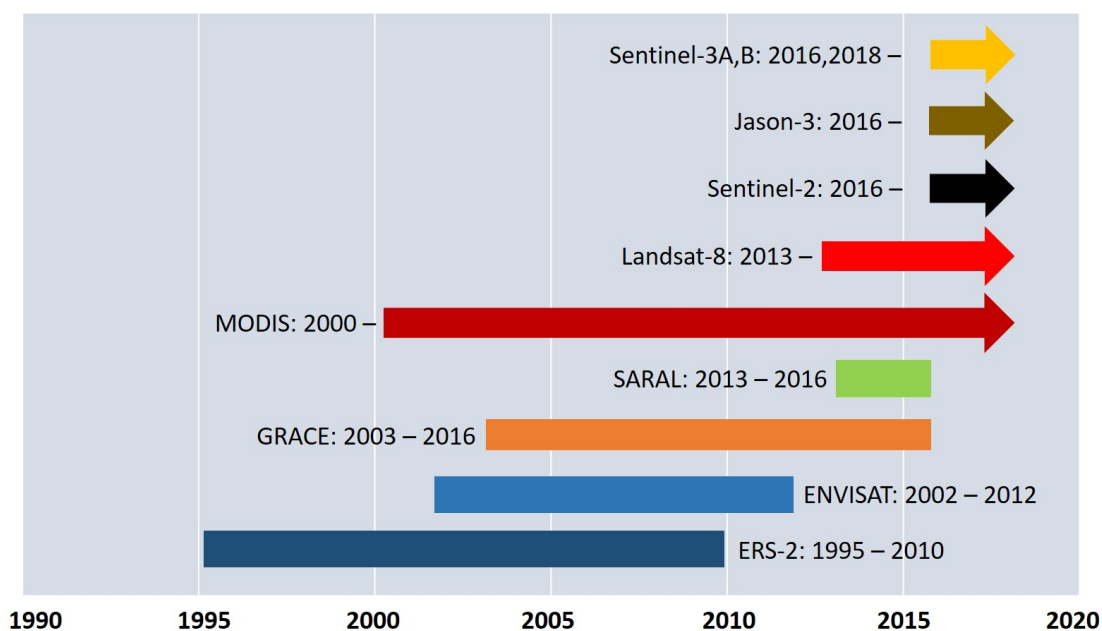

Figure S2: List of satellite datasets used in this study.

55 **Land Surface Water Extent Mapping with MODIS Imagery**

56 Examples of monthly surface water extent maps derived from MODIS imagery over Lake Chad  
57 for January, April, July and October 2003 is shown in Figure S3. Vegetation cover over the Lake is  
58 also presented. It is clear that vegetation cover is limited at the beginning of the year (in January),  
59 then it increases gradually in April and July until it reaches the maximum when the wet season  
60 comes in October.

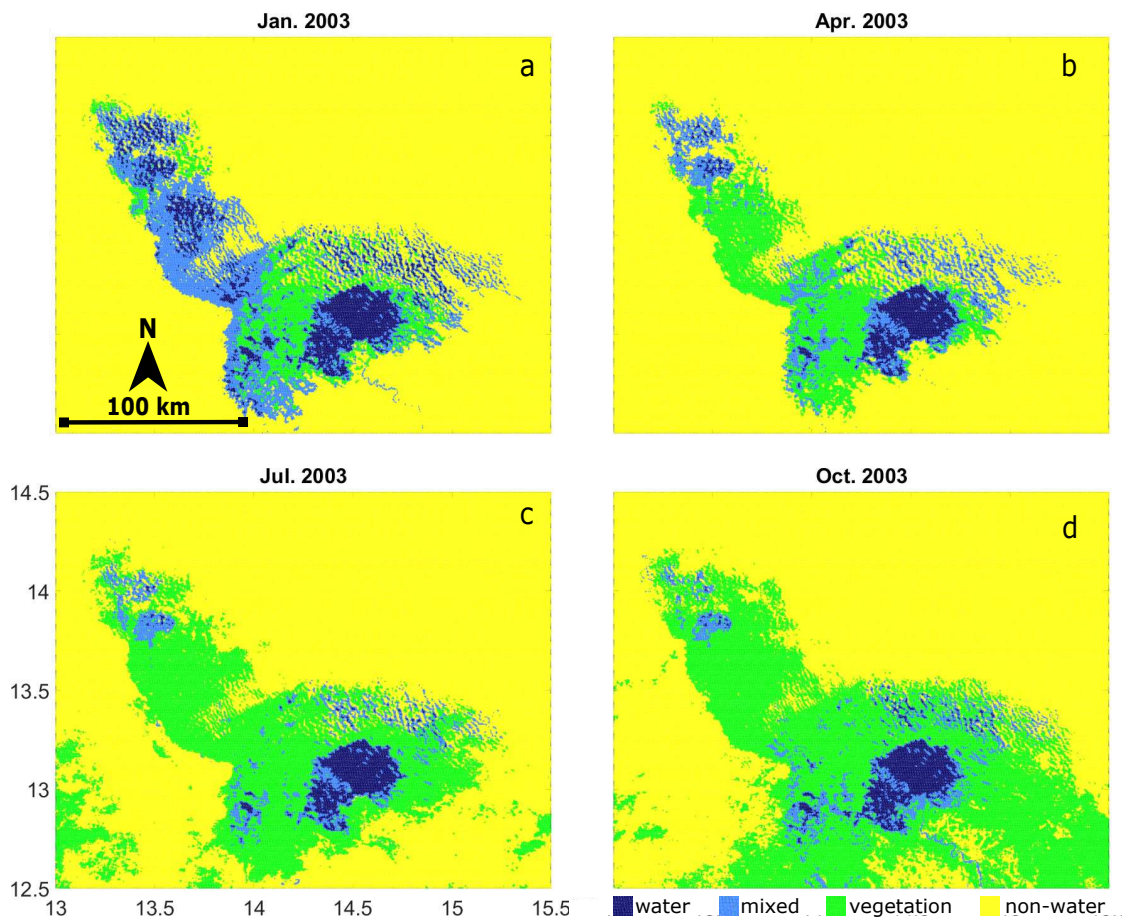

Figure S3: Examples of surface water extent maps derived from MODIS (at 500 m spatial resolution) over Lake Chad for January, April, July and October 2003

## 61 **Land Surface Water Extent Mapping with Landsat-8 and Sentinel-2 Imagery.**

The variations of surface water extent at both regional and global scales have been monitored using higher spatial resolution images from Landsat<sup>8-11</sup>, and recently Sentinel-2<sup>12,13</sup> observations. The main principle of these studies is to distinguish water and non-water bodies based on the application of water indices<sup>13</sup>, such as the Normalized Difference Vegetation Index (NDVI)<sup>14</sup>, the Normalized Difference Water Index (NDWI)<sup>15</sup>, the Modified Normalized Difference Water Index (MNDWI)<sup>16</sup>, or the Automated Water Extraction Index (AWEI)<sup>17</sup>. Some authors compared the performance of these indices in different regions<sup>12,16,18-20</sup>, and concluded that the MNDWI normally gives the best result among all the indices. Over Lake Chad basin, the MNDWI was also reported to work better than other indices in detecting surface water bodies<sup>20,21</sup>. In this study, we apply a threshold on the MNDWI to separate water and non-water bodies within Lake Chad region. By definition, the MNDWI is the ratio between the green band and the middle infrared band<sup>16</sup> (see Equation (1)).

$$MNDWI = \frac{Green - MIR}{Green + MIR} \quad (1)$$

62 Over water bodies, MIR wavelengths (1550-1750 nm) are almost completely absorbed and the  
63 green wavelengths (520-600 nm) are highly reflected. As a consequence, water surfaces usu-  
64 ally have high positive MNDWI values. In contrast, vegetation canopy and soil usually have low  
65 negative MNDWI values because the MIR wavelengths are reflected more than the green wave-  
66 lengths. A threshold ( $T = 0$ ) is normally set in order to distinguish water from non-water pixels.  
67 However, we found that with this threshold, the derived surface water extent maps within Lake  
68 Chad are overestimated, especially over the north part of the southern pool. Some authors applied

69 Otsu algorithm<sup>22</sup> to automatically extract surface water bodies as it is one of the best thresholding  
70 techniques<sup>20</sup>. To obtain the best result, the Otsu algorithm requires that the image to be classified  
71 must have bi-modal or multi-modal histogram distribution. This method does not provide the best  
72 result if the histogram is uni-modal or close to uni-modal. We tested the Otsu algorithm with both  
73 Landsat-8 and Sentinel-2 images, but results were not satisfied because the MNDWI histogram  
74 distributions were not bi-modal as the number of non-water pixels is much larger than the number  
75 of of water pixel (see Figure S4). After many careful tests on different thresholds between 0 and the  
76 Otsu threshold (0.3176), the MNDWI threshold for Lake Chad was set to 0.2. This is consistence  
77 with Zhu et al. (2017)<sup>21</sup> which also applied the same threshold value for classifying surface water  
78 extent over the southern pool of Lake Chad. Table S1 shows the corresponding green and MIR  
79 bands from Landsat-8 and Sentinel-2 used to calculate the MNDWI. For Sentinel-2 imagery, the  
80 spatial resolutions of green and MIR bands are 10 m and 20 m, respectively. To produce MNDWI  
81 at 10 m spatial resolution, the MIR band is resampled to downscale the spatial resolution from  
82 20 m to 10 m using image fusion technique (e.g., pan-sharpening<sup>23</sup>). All Landsat-8 and Sentinel-  
83 2 pre-processing steps are processed using ENVI and ESA's SNAP software. See the temporal  
84 distribution of Landsat-8 and Sentinel-2 used in this study in Figure S1.

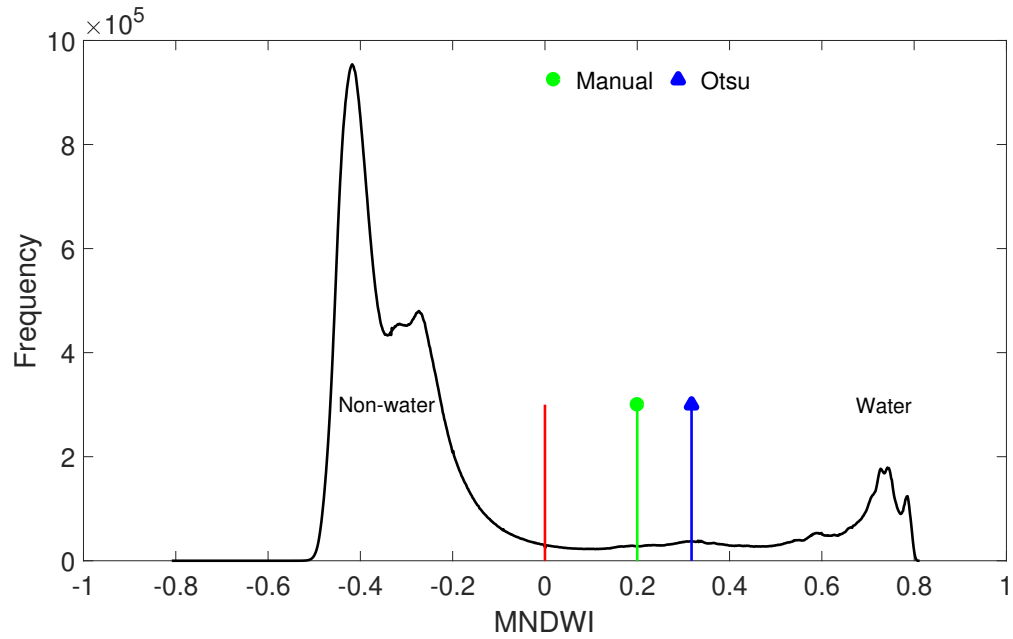

Figure S4: Histogram of a Sentinel-2 MNDWI imagery over Lake Chad (acquired on 6 October 2017) with three different threshold values.

Table S1: Corresponding Landsat-8 and Sentinel-2 Green and MIR bands used to calculate the MNDWI.

|                   | <b>Green band</b>         | <b>MIR band</b>              |
|-------------------|---------------------------|------------------------------|
| <b>Landsat-8</b>  | Band 3 (530-590 nm; 30 m) | Band 6 (1570-1650 nm; 30 m)  |
| <b>Sentinel-2</b> | Band 3 (523-595 nm; 10 m) | Band 11 (1520-1700 nm; 20 m) |



85 **Validation of MODIS-derived Surface Water Extent Maps**

86 To validate our MODIS-derived surface water extent maps, we compared with results derived  
87 from Landsat and Sentinel-2 imagery. Figure S5 shows inundation frequency of Lake Chad de-  
88 rived from 18 years (2001-2018) of MODIS data (left), and from 32 years (1984-2015) of Landsat  
89 data (right)<sup>11</sup>. The structure of Lake Chad inundation frequency is very similar, with high inun-  
90 dated ratio in the southern pool, lower inundated ratio in the Archipelagos, and much lower in the  
91 northern pool, as expected. Between the two pools, there is a non-inundated area as this part is  
92 always covered by permanent vegetation. At this stage, we are not sure that this area is totally dry,  
93 or there are water under the vegetation canopy but they are invisible from satellite sensors (both  
94 optical and radar). Results from Landsat data suggest that the inundated ratio in the northern pool  
95 and in the Archipelagos is higher than from MODIS. This can be explained by the fact the the time

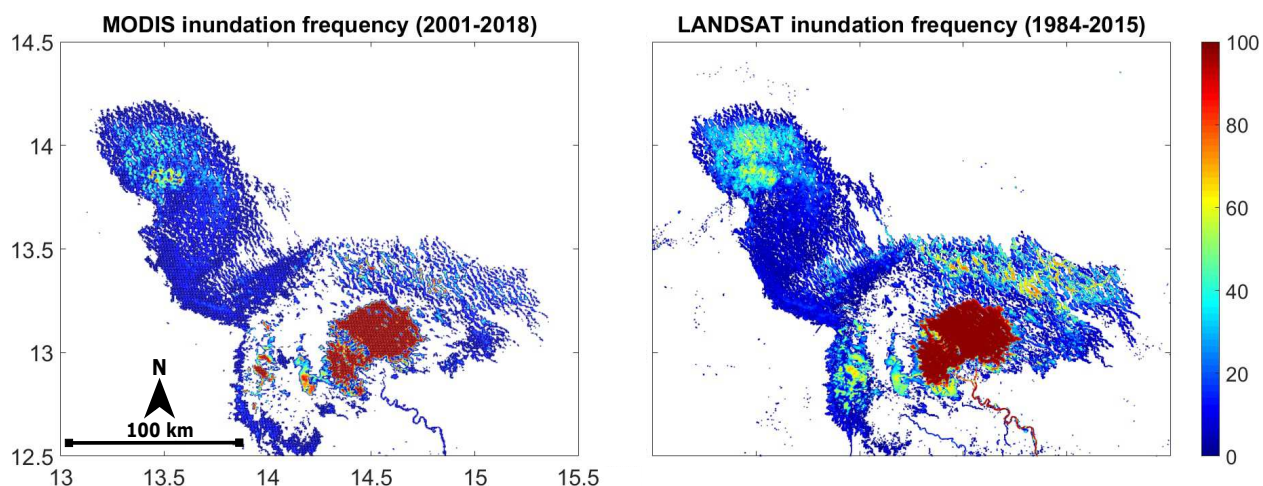

Figure S5: Inundation frequency of Lake Chad derived from 18 years of MODIS (left) and 32 years of Landsat data (right).

96 series of Landsat data used in Pekel et al. (2016)<sup>11</sup> for the estimation is nearly double compared to  
97 the time series of MODIS data we used in this study (32 years compared to 18 years). Permanent  
98 surface water extent (when the surface are inundated  $\geq 80\%$  during the study period) derived from  
99 MODIS and Landsat are 1595 km<sup>2</sup> and 1515 km<sup>2</sup>, respectively. As Landsat have higher spatial  
100 resolution than MODIS, Landsat image shows many details of small water bodies than MODIS  
101 (for example, the tiny river in the southwest of the southern pool).

102 Very good agreement are also evidenced when compare MODIS-derived with Sentinel-2-  
103 derived surface water extent maps of the southern pool in dry and wet seasons 2017 (Figure S6).  
104 The southern pool appears clearly in both MODIS and Sentinel-2 surface water extent maps, and  
105 advantages of higher Sentinel-2 spatial resolution (10 m) are obviously seen. Rivers and small  
106 water bodies in the Archipelagos are totally detected in Sentinel-2 maps, but partly or not detected  
107 in MODIS maps. 43 free-cloud Sentinel-2 imagery ( $\leq 5\%$  cloud contamination) are processed to  
108 obtain the time series of surface water extent in the southern pool for the October 2016 - December  
109 2018 period, for comparison with MODIS results (Figure S7). The two time series show a very  
110 high linear temporal correlation (96%), but MODIS always underestimates surface water extent  
111 compared to Sentinel-2. This is expected because the spatial resolution of Sentinel-2 is 250 times  
112 higher than MODIS, therefore, Sentinel-2 can detect much better small water bodies than MODIS.  
113 Total surface water area detected by Sentinel-2 is 14%-15% higher than that detected by MODIS.  
114 The difference in the rainy seasons is lower (9%-10%) than in the dry seasons (18%-20%). The dif-  
115 ference mostly comes from the river, and especially from the Archipelagos where the environment  
116 is very complicated by the combination of soil, water and sand.

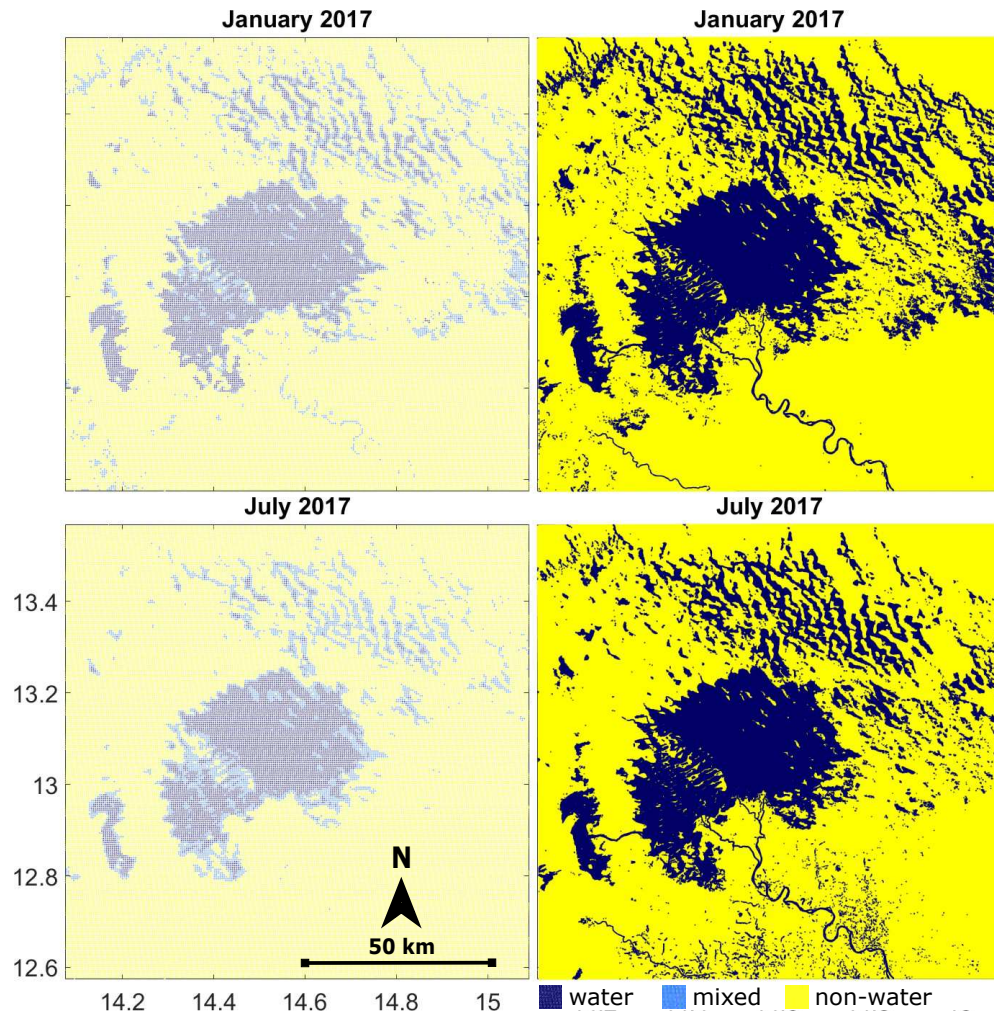

Figure S6: Surface water extent maps over the southern pool of Lake Chad, derived from MODIS (left) and Sentinel-2 (right) in dry and rainy seasons 2017. Sentinel-2 images were acquired on 29 January and 27 July 2017, respectively.

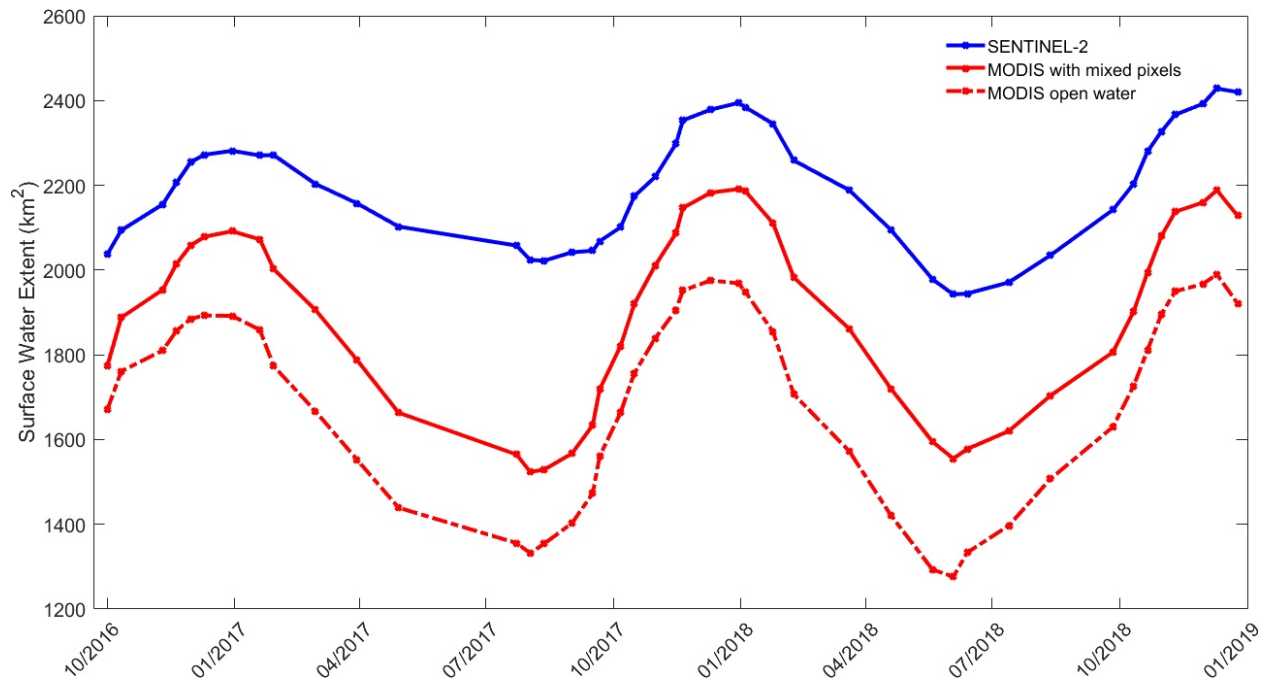

Figure S7: Comparison between time series of surface water extent over the southern pool of Lake Chad derived from MODIS and Sentinel-2 for the October 2016 - December 2018 period. See Figure S1 for the temporal distribution of Sentinel-2 images.

117 **Annual variation of surface water and permanent vegetation**

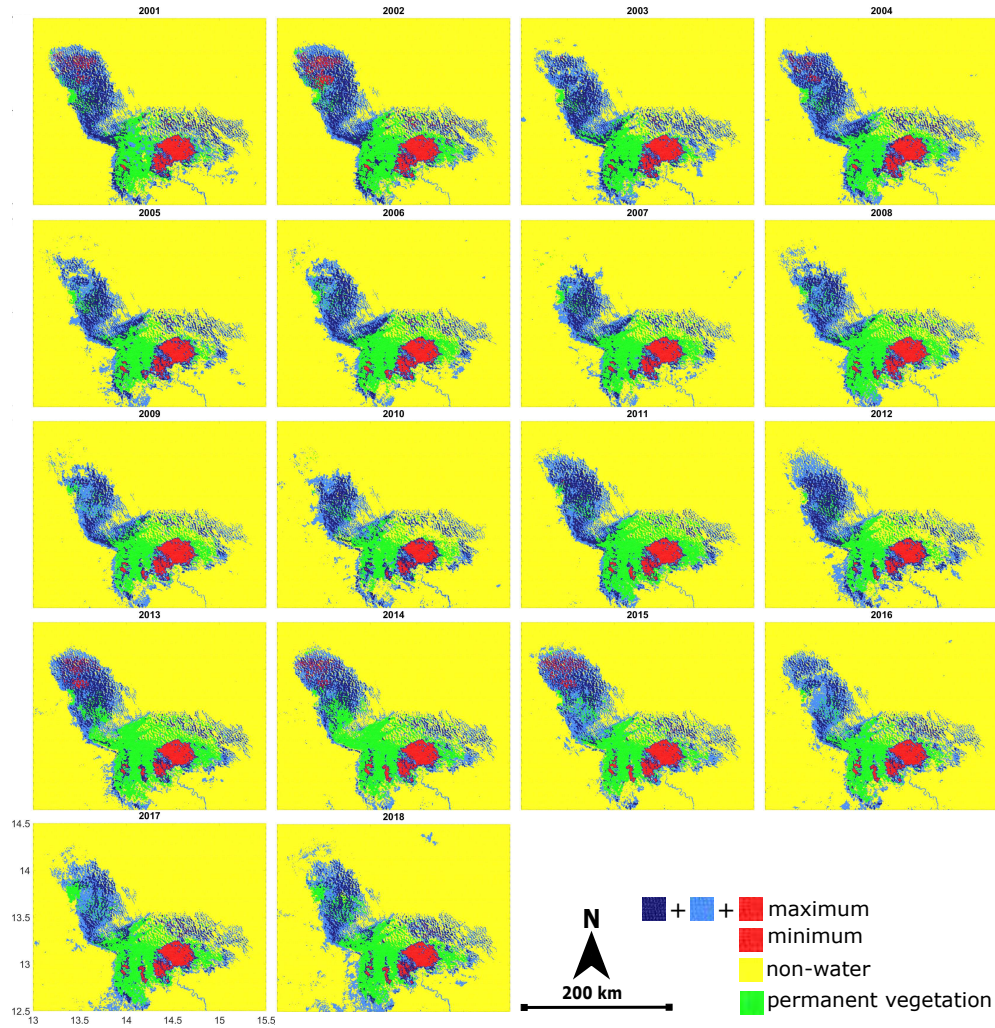

Figure S8: Annual minimum (red) and maximum (red, light and dark blue) surface water extent, and permanent vegetation (green) of Lake Chad from 2001 to 2018.

118 Annual minimum (red) and maximum (red, light and dark blue) of surface water extent of  
119 Lake Chad over the last 18 years are shown in Figure S8. It clearly shows that the southern pool of  
120 Lake Chad is very stable during almost the last 20 years, at both minimum and maximum states.  
121 In the northern pool, surface water extent variation is more dynamic.



122 Figure S9 shows the increase of permanent vegetation cover between the two pools as shown  
123 in Figure S8. An increase of  $\sim 30\%$  of permanent vegetation is evidenced between 2001 ( $\sim 3800$   
124  $\text{km}^2$ ) and 2018 ( $\sim 5200 \text{ km}^2$ ).

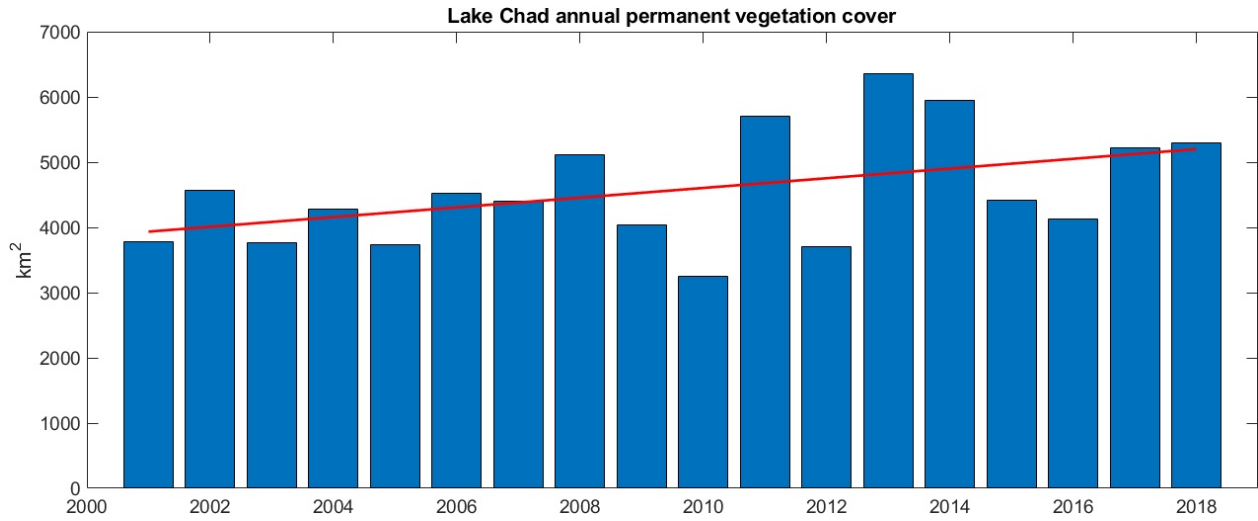

Figure S9: Annual permanent vegetation cover over Lake Chad for the 2001-2018 period.

125 **Monthly surface water level maps**

126 Examples of monthly surface water level maps over Lake Chad in January, April, July, and October

127 2003 are shown in Figure S10.

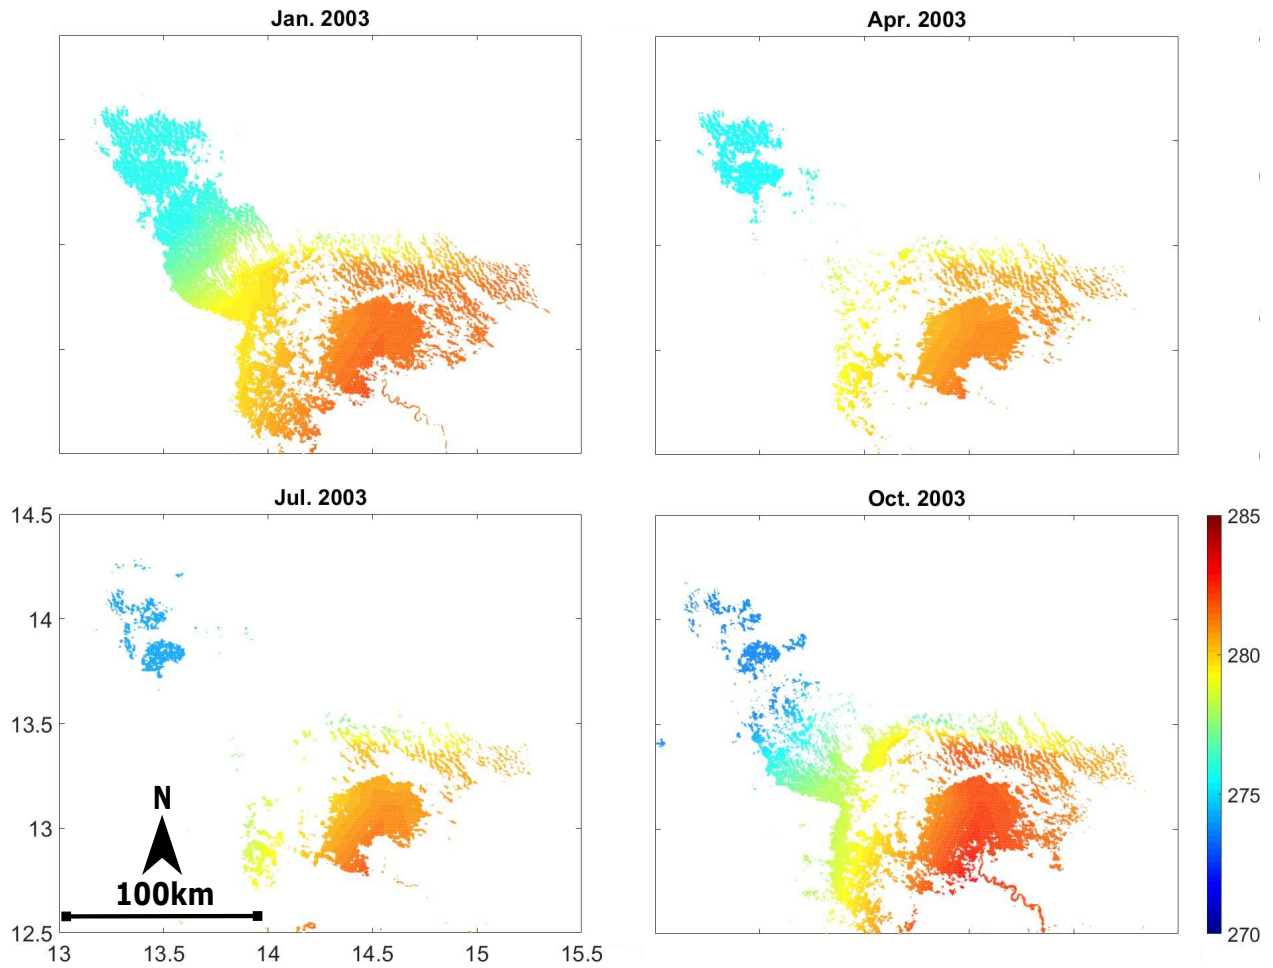

Figure S10: Surface water level maps (in m) at 500 m spatial resolution for January, April, July, and October 2003.

128 **Variation of river discharge**

129 Monthly in situ discharge data at four gauge stations, for the 1985-2015 period, are collected and  
130 shown in Figure S11. The longest time series data (back to 1950) are only available in N’Djamena  
131 station. Figure S11 clearly shows the decreasing trend of discharge from 1950s to the end of 1980s,  
132 but from the beginning of 1990s until present time, discharge is slowly increasing again.

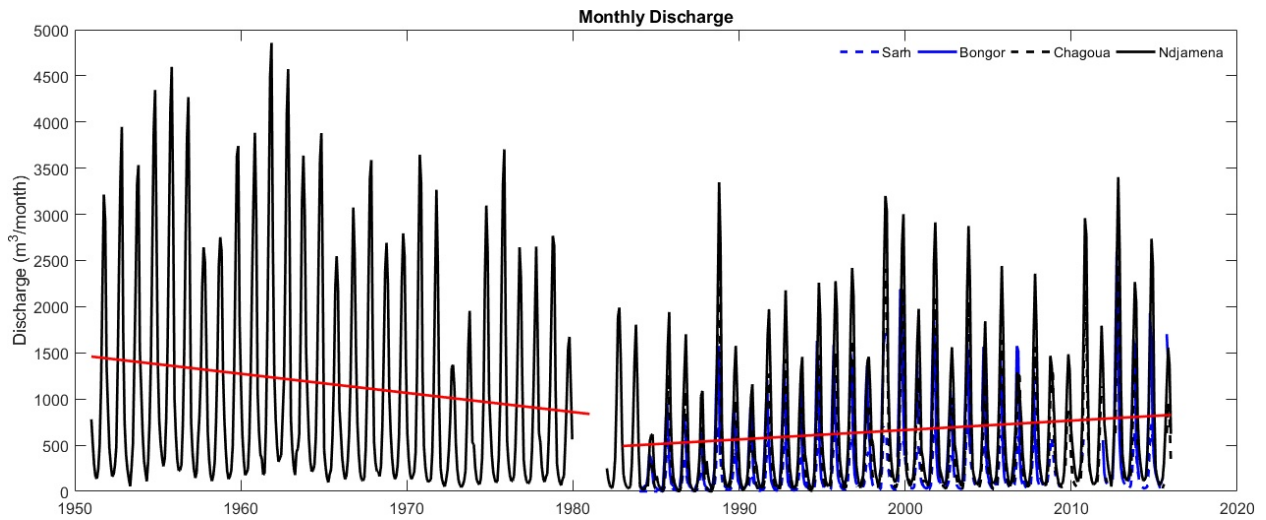

Figure S11: Monthly in situ discharge time series at four gauge stations (N’Djamena, Chagoue, Bongor, and Sarh). Their trends (red) are also plotted.



- 134 1. Cretaux, J.-F. *et al.* SOLS: A lake database to monitor in the Near Real Time water level and  
135 storage variations from remote sensing data. *Advances in Space Research* **47**, 1497 – 1507  
136 (2011).
- 137 2. Ramillien, G., Frappart, F., Cazenave, A. & Guntner, A. Time variations of land water storage  
138 from an inversion of 2 years of GRACE geoids. *Earth and Planetary Science Letters* **235**, 283  
139 – 301 (2005).
- 140 3. Frappart, F. *et al.* Remote Sensing of Environment Satellite-based estimates of groundwater  
141 storage variations in large drainage basins with extensive floodplains. *Remote Sensing of*  
142 *Environment* **115**, 1588–1594 (2011).
- 143 4. Sakumura, C., Bettadpur, S. & Bruinsma, S. Ensemble prediction and intercomparison anal-  
144 ysis of GRACE time-variable gravity field models. *Geophysical Research Letters* **41**, 1389–  
145 1397 (2014).
- 146 5. Landerer, F. W. & Swenson, S. C. Accuracy of scaled GRACE terrestrial water storage esti-  
147 mates. *Water Resources Research* **48** (2012).
- 148 6. Miralles, D. G. *et al.* Global land-surface evaporation estimated from satellite-based observa-  
149 tions. *Hydrology and Earth System Sciences* **15**, 453–469 (2011).
- 150 7. Martens, B. *et al.* GLEAM v3: satellite-based land evaporation and root-zone soil moisture.  
151 *Geoscientific Model Development* **10**, 1903–1925 (2017).
- 152 8. Du, Z., Li, W., Zhou, D., Tian, L. & Ling, F. Analysis of Landsat-8 OLI imagery for land  
153 surface water mapping. *Remote Sensing Letter* **5**, 672–681 (2014).

- 154 9. Mueller, N. *et al.* Water observations from space: Mapping surface water from 25 years of  
155 Landsat imagery across Australia. *Remote Sensing of Environment* **174**, 341–352 (2016).
- 156 10. Yamazaki, D., Trigg, M. A. & Ikeshima, D. Development of a global 90m water body map  
157 using multi-temporal Landsat images. *Remote Sensing of Environment* **171**, 337–351 (2015).
- 158 11. Pekel, J.-F., Cottam, A., Gorelick, N. & Belward, A. S. High-resolution mapping of global  
159 surface water and its long-term changes. *Nature* **540**, 418–422 (2016).
- 160 12. Du, Y. *et al.* Water Bodies ' Mapping from Sentinel-2 Imagery with Modified Normalized  
161 Difference Water Index at 10-m Spatial Resolution Produced by Sharpening the SWIR Band.  
162 *Remote Sensing* **8** (2016).
- 163 13. Yang, X., Zhao, S., Qin, X., Zhao, N. & Liang, L. Mapping of Urban Surface Water Bodies  
164 from Sentinel-2 MSI Imagery at 10 m Resolution via NDWI-Based Image Sharpening. *Remote*  
165 *Sensing* **9** (2017).
- 166 14. Rouse Jr., J., Haas, R., Schell, J. & Deering, D. Monitoring Vegetation Systems in the Great  
167 Plains with ERTS. *NASA Special Publication* **351**, 309 (1974).
- 168 15. McFeeters, S. K. The use of the Normalized Difference Water Index (NDWI) in the delineation  
169 of open water features. *International Journal of Remote Sensing* **17**, 1425–1432 (1996).
- 170 16. Xu, H. Modification of Normalised Difference Water Index (NDWI) to enhance open water  
171 features in remotely sensed imagery. *International Journal of Remote Sensing* **27**, 3025–3033  
172 (2006).

- 173 17. Feyisa, G. L., Meilby, H., Fensholt, R. & Proud, S. R. Automated Water Extraction Index  
174 : A New Technique for Surface Water Mapping Using Landsat Imagery. *Remote Sensing of*  
175 *Environment* **140**, 23–35 (2014).
- 176 18. Li, W. *et al.* A Comparison of Land Surface Water Mapping Using the Normalized Difference  
177 Water Index from TM, ETM+ and ALI. *Remote Sensing* **5**, 5530–5549 (2013).
- 178 19. Singh, K. V., Setia, R., Sahoo, S., Prasad, A. & Pateriya, B. Evaluation of NDWI and MNDWI  
179 for assessment of waterlogging by integrating digital elevation model and groundwater level.  
180 *Geocarto International* **30**, 650–661 (2015).
- 181 20. Buma, W. G., Lee, S. I. & Seo, J. Y. Recent surface water extent of Lake Chad from multi-  
182 spectral sensors and GRACE. *Sensors* **18** (2018).
- 183 21. Zhu, W., Yan, J. & Jia, S. Monitoring Recent Fluctuations of the Southern Pool of Lake Chad  
184 Using Multiple Remote Sensing Data: Implications for Water Balance Analysis. *Remote*  
185 *Sensing* **9** (2017).
- 186 22. Otsu, N. A threshold selection method from gray-level histograms. *IEEE Transactions on*  
187 *Systems, Man, and Cybernetics* **9**, 62–66 (1979).
- 188 23. Vivone, G. *et al.* A critical comparison among pansharpening algorithms. *IEEE Transactions*  
189 *on Geoscience and Remote Sensing* **53**, 2565–2586 (2015).
